# Supplementary material for: Epitope editing enables targeted immunotherapy of acute myeloid leukaemia
Source: PubMed Central journal article supplement (PMC10499609; doi:10.1038/s41586-023-06496-5), 2023-08-30
Supplement: 41586_2023_6496_MOESM1_ESM.pdf [file 41586_2023_6496_MOESM1_ESM.pdf]

**Supplementary information**

---

**Epitope editing enables targeted immunotherapy of acute myeloid leukaemia**

---

In the format provided by the authors and unedited

## Supplementary Information Guide

**Supplementary Figure 1 – A.** Flow cytometry fluorescence minus-one (FMO) controls for FIG.1b and 1g. From left to right, controls for FLT3 staining (Fig.1b left), KIT staining (Fig.1b right) and CD123 staining (Fig.1g) **B.** Uncropped pictures of western blots in FIG.1c. The samples and stimulation conditions are identified with the labels.

**Supplementary Figure 2 – A.** Uncropped pictures of western blots in Extended Data FIG.2a. From left to right, WT FLT3, FLT3 N399D and FLT3 N399G stimulated with different concentrations of FLT3L. **B.** Uncropped pictures of western blots in Extended Data FIG.2b. From left to right, WT KIT and KIT H378R, stimulated with different concentrations of SCF. **C.** Gating strategy for sorting of edited CD34<sup>+</sup> HSPCs progenitor fractions in FIG.3b: CD34<sup>+</sup>133<sup>+</sup>45RA<sup>+</sup>90<sup>-</sup>, CD34<sup>+</sup>133<sup>+</sup>45RA<sup>-</sup>90<sup>-</sup>, CD34<sup>+</sup>133<sup>+</sup>45RA<sup>-</sup>90<sup>+</sup>49f<sup>-</sup>, CD34<sup>+</sup>133<sup>+</sup>45RA<sup>-</sup>90<sup>+</sup>49f<sup>mid</sup>.

**Supplementary Figure 3 – A.** List of the NGS sequenced predicted off-target sites for FLT3-sgRNA-18, CD123-sgRNA-R, KIT-sgRNA-Y and FLT3-sgRNA-16. OT sites were identified by searching CRISPOR online tool with each sgRNA sequence, PAM = NRN, Reference genome hg38 and filtered by highest MIT off-target score. Top hits for intronic and exonic regions were selected for targeted deep sequencing. locusDesc indicates the gene name and intronic or exonic location; mismatchPos shows the position of each mismatched base within the sgRNA sequence (\*).

**Supplementary Figure 4 - A.** Representative flow cytometry gating strategy for bone marrow analysis of mice xeno-transplanted with edited HSPCs and/or AML PDX (experiment from FIG.5). Cells are pre-gated on singlets, live and physical parameter gates. Populations: 1. human CD45<sup>+</sup>; 2. T cells (CAR); 3. mNeonGreen<sup>+</sup> (AML PDX); 4. human CD45<sup>+</sup> w/o CAR or AML; 5. total CD19<sup>+</sup>; 6. total myeloid cells (CD33/66b<sup>+</sup>); 7. granulocytes + mast cells; 8. Monocytes; 9. mast cells; 10. total granulocytes; 11. mature granulocytes (CD10<sup>+</sup>/11c<sup>+</sup>); 12. immature granulocytes (CD10<sup>-</sup>/11c<sup>-</sup>); 13. classical dendritic cells, cDC; 14. pro-B cells; 15. pre-B cells; 16. mature B cells; 17. natural killer cells, NK; 18. Prolymphocytes; 19. Myeloblasts; 20. lin-CD34<sup>+</sup> (CD33/66<sup>+</sup> lin-CD34<sup>+</sup> and CD33/66<sup>-</sup> lin-CD34<sup>+</sup> are pooled for downstream gating); 21. Lin-CD34<sup>+</sup>38<sup>+</sup>; 22. Lin-CD34<sup>+</sup>38<sup>-</sup>; 23. Pre- B/NK; 24. granulo-mono progenitors, GMP; 25. common myeloid progenitors, CMP; 26. meka-erythroid progenitors, MEP; 27. hematopoietic stem cells, HSC; 28. multipotent progenitors, MPP; 29. lymphoid-primed multipotent progenitors, LMPP; 30. Beads gate; 31. murine CD45<sup>+</sup>; 32. plasmacytoid DC; 33. multipotent lymphoid progenitors MLP. CountBeads are first gated on singlets as FSC-A<sup>low</sup>PI<sup>high</sup> and then with two additional fluorescent parameters (plot in the bottom left corner). **B.** Representative flow cytometry gating strategy for T cell panels on the bone marrow and spleen. Cells are pre-gated on singles, live and physical parameter gates. Human CD45<sup>+</sup> cells are separated in CD3<sup>+</sup> (T cells) and CD3<sup>-</sup>, within which the residual AML is gated as mNeonGreen<sup>+</sup>. CAR<sup>+</sup> cells are identified by EGFR staining. T cell phenotype is evaluated on gated CD8<sup>+</sup> and CD4<sup>+</sup> cells by CD45RA and CD62L. **C.** Representative flow cytometry plots that highlight the discrimination of transduced AML PDX-1 cells (CD33<sup>+</sup>56<sup>+</sup>) from healthy CD34<sup>+</sup> derived hematopoiesis.

**Supplementary Data Table 1** - sequences of 1) gRNAs used in the experiments; 2) primers for PCR amplification and editing quantification; 3) Sleeping Beauty plasmids expressing FLT3, KIT, CD123; 4) Receptor variants; 5) Base editors; 6) ssODN template donors.

**Supplementary Data Table 2** - 1) the markers used for gating hematopoietic populations in bone marrow samples; 2) the list of monoclonal antibodies used for flow cytometry, manufacturers, catalog numbers and dilutions used.

**Supplementary Data Table 3** – RNAseq of CD34+ HSPCs, list of the DEGs FLT3L vs unstimulated

**Supplementary Data Table 4** – RNAseq of CD34+ HSPCs, list of the DEGs IL-3 vs unstimulated

**Supplementary Data Table 5** – RNAseq of CD34+ HSPCs, list of the DEGs SCF vs unstimulated

**Supplementary Data Table 6** – RNAseq of CD34+ HSPCs, list of the DEGs UT vs AAVS1

**Supplementary Data Table 7** – RNAseq of CD34+ HSPCs, Gene Set Enrichment Analyses (GSEA)

**Supplementary Data Table 8** – RNAseq of CD34+ HSPCs, KEGG pathway enrichment analysis

**Supplementary Data Table 9** – RNAseq of CD34+ HSPCs, Reactome pathway enrichment analysis

**Supplementary Data Table 10** – RNAseq of CD34+ HSPCs, list of the DEGs FLT3-BE vs AAVS1

**Supplementary Data Table 11** – RNAseq of CD34+ HSPCs, list of the DEGs CD123-BE vs AAVS1

**Supplementary Data Table 12** – RNAseq of CD34+ HSPCs, list of the DEGs KIT-BE vs AAVS1

**Supplementary Data Table 13** – phospho-MS of CD34+ HSPCs, list of the DEGs FLT3L vs unstimulated

**Supplementary Data Table 14** – phospho-MS of CD34+ HSPCs, list of the DEGs IL-3 vs unstimulated

**Supplementary Data Table 15** – phospho-MS of CD34+ HSPCs, list of the DEGs SCF vs unstimulated

**Supplementary Data Table 16** – Guide-SEQ off-target results

**Supplementary Data Table 17** – FLT3 sgRNA-18 predicted OT list and NGS results

**Supplementary Data Table 18** – CD123 sgRNA-R predicted OT list and NGS results

**Supplementary Data Table 19** – KIT sgRNA-Y predicted OT list and NGS results

**Supplementary Data Table 20** – FLT3 sgRNA-16 predicted OT list and NGS results

**Supplementary Data Table 21** – RNAseq OT deamination, metrics and coverage for analysis of non-gRNA mediated random deamination reported in Extended Data Fig.8c.

**Supplementary Data Table 22** – SNTG1 read count in RNAseq samples from Fig.3g, supporting the lack of expression in hematopoietic progenitors.

**Supplementary Data Table 23** – in vivo BM absolute counts of hematopoietic subsets.

**Supplementary Data Table 24** – Multiple comparison of dual CAR in vitro killing (Fig.6c).
